# Supplementary material for: Photo-induced reversible nitric oxide capture by Fe–M(CO2H)4 (M = Co, Ni, Cu) as a building block of mixed-metal BTC-based MOFs
Source: Royal Society of Chemistry journal article supplement (doi:10.1039/d2cp02337g), 2022-01-01
Supplement: d2cp02337g1.pdf [file d2cp02337g1.pdf]

## **Electronic Supplementary Information**

**for**

Photo-induced reversible nitric oxide capture by

Fe-M(CO<sub>2</sub>H)<sub>4</sub> (M= Co, Ni, Cu) as building

blocks of mixed metal BTC-based MOFs

Azadeh Yeganeh Jabri and Afshan Mohajeri\*

Department of Chemistry, College of Sciences, Shiraz University, Shiraz 7194684795, Iran

## Content

**Table S1.** Comparison of the structural parameters and electronic transition wavelengths of  $\text{Cu}_2(\text{BTC})_4$  obtained by different DFT methods with experimental values.

**Table S2.** Geometric and electronic properties of the  $\text{Fe-M}(\text{CO}_2\text{H})_4$  ( $\text{M}=\text{Co}, \text{Ni}, \text{Cu}$ ) in their possible spin state configurations.

**Table S3.** Computed HFC tensors (in MHz) and  $g$ -tensors for the Fe and M nuclei of the  $\text{Fe-M}(\text{CO}_2\text{H})_4$  systems in their possible spin state configurations.

**Table S4.** The electronic excitation parameters, wavelengths  $\lambda$  (nm), oscillator strength ( $f$ ), and the molecular orbital contributions in the dominant electronic transitions for  $\text{Fe-Ni}(\text{BTC})_4$  and  $\text{Fe-Ni}(\text{BDC})_4$  systems.

**Table S5.** Adsorption enthalpies for different adsorption modes of NO molecule over  $\text{Fe-M}(\text{CO}_2\text{H})_4$  ( $\text{M}=\text{Co}, \text{Ni}, \text{Cu}$ ) systems.

**Table S6.** The calculated HFC tensor (MHz) for nitric oxide.

**Figure S1.** structure of A)  $\text{Fe-Ni}(\text{BTC})_4$  and B)  $\text{Fe-Ni}(\text{BDC})_4$ . [color code: violet = Fe, red = O, gray = C, white = H, and pink= Ni].

**Figure S2.** A) Initial configurations of adsorbed NO molecule in the N-head and O-head at the metal sites and formate group of the  $\text{Fe-M}(\text{CO}_2\text{H})_4$  system. B) Global minima configurations related to the lowest energy configurations for the adsorption of NO over: a)  $\text{Fe-Co}(\text{CO}_2\text{H})_4$ , b)  $[\text{Fe-Co}(\text{CO}_2\text{H})_4]^-$ , c)  $\text{Fe-Ni}(\text{CO}_2\text{H})_4$ , d)  $[\text{Fe-Ni}(\text{CO}_2\text{H})_4]^-$ , and e)  $\text{Fe-Cu}(\text{CO}_2\text{H})_4$  systems. [color code: red = O, dark blue= N, gray = C, white = H, violet = Fe, blue=Co, pink=Cu and light blue= Ni].

**Cartesian coordinates of isolated  $\text{Fe-M}(\text{CO}_2\text{H})_4$  systems as well as their complexes with NO molecule.**

**Table S1.** Comparison of the structural parameters and electronic transition wavelengths of  $\text{Cu}_2(\text{BTC})_4$  obtained by different DFT methods with experimental values.

|                           | Cu-Cu(Å)    | Cu-O(Å)     | $\lambda(\text{nm})$ | $\lambda(\text{nm})$ |
|---------------------------|-------------|-------------|----------------------|----------------------|
| <b>Exp.<sup>1,2</sup></b> | <b>2.50</b> | <b>1.94</b> | <b>333</b>           | <b>500</b>           |
| PBE0                      | 2.50        | 1.96        | 317                  | 448                  |
| TPSSH                     | 2.47        | 1.96        | 308                  | 439                  |
| MN12-L                    | 2.45        | 1.94        | 302                  | 398                  |
| M06-2X                    | 2.48        | 1.97        | 321                  | 456                  |
| <b>HSE06</b>              | <b>2.50</b> | <b>1.95</b> | <b>338</b>           | <b>490</b>           |
| BP86                      | 2.52        | 1.98        | 346                  | 458                  |
| B3LYP                     | 2.54        | 1.98        | 324                  | 462                  |

- 1- K. S. Lin, A. K. Adhikari, Ch. N. Ku, Ch. L. Chiang and H. Kuo, International Journal of Hydrogen Energy. 2012, 37, 13865-13871.
- 2- H. K. Kim, W. S. Yun, M. B. Kim, J. Y. Kim, Y.S. Bae, J. D. Lee and N. Ch. Jeong, J. Am. Chem. Soc. 2015, 137, 10009–10015.

**Table S2.** Geometric and electronic properties of the Fe-M (CO<sub>2</sub>H)<sub>4</sub> (M=Co, Ni, Cu) in their possible spin state configurations.

|                                       | 2S+1    | Fe-O<br>(Å) | M-O<br>(Å) | Fe-M<br>(Å) | ∠O-Fe-O<br>(deg) | ∠O-M-O<br>(deg) | q <sub>Fe</sub><br>(e) | q <sub>M</sub><br>(e) | <i>J</i> (cm <sup>-1</sup> ) |
|---------------------------------------|---------|-------------|------------|-------------|------------------|-----------------|------------------------|-----------------------|------------------------------|
| Fe-Co(CO <sub>2</sub> H) <sub>4</sub> | doublet | 1.93        | 1.92       | 2.35        | 89.95            | 89.97           | 0.79                   | 0.77                  |                              |
|                                       | quartet | 1.92        | 1.92       | 2.43        | 90.96            | 89.87           | 0.85                   | 0.77                  | <i>J</i> <sub>4↔2</sub> 1557 |
|                                       | sextet  | 2.02        | 1.91       | 2.53        | 88.76            | 89.99           | 1.25                   | 0.74                  | <i>J</i> <sub>6↔4</sub> 3898 |
|                                       | octet   | 2.02        | 2.02       | 2.57        | 88.92            | 89.95           | 1.24                   | 1.09                  | <i>J</i> <sub>8↔6</sub> 2606 |
| Fe-Ni(CO <sub>2</sub> H) <sub>4</sub> | singlet | 1.96        | 1.86       | 2.32        | 89.96            | 89.98           | 0.76                   | 0.75                  |                              |
|                                       | triplet | 1.95        | 1.88       | 2.44        | 89.85            | 89.93           | 0.80                   | 0.75                  | <i>J</i> <sub>3↔1</sub> 5248 |
|                                       | quintet | 2.09        | 1.88       | 2.50        | 89.21            | 90.01           | 1.22                   | 0.70                  | <i>J</i> <sub>5↔3</sub> 1267 |
|                                       | septet  | 2.00        | 2.01       | 2.51        | 89.13            | 89.99           | 1.25                   | 1.01                  | <i>J</i> <sub>7↔5</sub> 2538 |
| Fe-Cu(CO <sub>2</sub> H) <sub>4</sub> | doublet | 1.93        | 1.97       | 2.57        | 89.39            | 89.90           | 0.62                   | 0.58                  |                              |
|                                       | quartet | 1.93        | 1.97       | 2.57        | 89.26            | 89.83           | 0.69                   | 0.44                  | <i>J</i> <sub>4↔2</sub> 7497 |
|                                       | sextet  | 2.05        | 1.95       | 2.72        | 87.89            | 89.90           | 0.92                   | 0.42                  | <i>J</i> <sub>6↔4</sub> 62   |

**Table S3.** Computed HFC tensors (in MHz) and  $g$ -tensors for the Fe and M nuclei of the Fe-M(CO<sub>2</sub>H)<sub>4</sub> systems in their possible spin state configurations.

|                                       | 2S+1 | $g_{\parallel}$ | $g_{\perp}$ | Fe       |          |           |                 | M        |          |           |                  |
|---------------------------------------|------|-----------------|-------------|----------|----------|-----------|-----------------|----------|----------|-----------|------------------|
|                                       |      |                 |             | $A^{FC}$ | $A^{PC}$ | $A^{iso}$ | A               | $A^{FC}$ | $A^{PC}$ | $A^{iso}$ | A                |
| Fe-Co(CO <sub>2</sub> H) <sub>4</sub> | 2    | 1.90            | 2.60        | 501      | 350      | 850       | 1193, 1139, 275 | -401     | -150     | -552      | -458, -458, -686 |
|                                       | 4    | 2.01            | 2.23        | 114      | 76       | 190       | 118, 118, 386   | 122      | 82       | 205       | 139, 218, 219    |
|                                       | 6    | 2.00            | 2.10        | 32       | 13       | 45        | 80, 80, -26     | 77       | 30       | 107       | 90, 90, 142      |
|                                       | 8    | 2.00            | 2.11        | 10       | 9        | 19        | 44, 44, -29     | 46       | 41       | 87        | -14, 138, 138    |
| Fe-Ni(CO <sub>2</sub> H) <sub>4</sub> | 3    | 1.95            | 3.80        | -78      | -280     | -358      | -513, -513, -46 | 7        | 8        | 15        | 24, 24, -1       |
|                                       | 5    | 2.03            | 2.10        | -18      | -9       | -27       | -51, -48, 13    | -0.5     | -0.5     | -1        | 34, -33, -3      |
|                                       | 7    | 2.04            | 2.09        | -12      | -3       | -15       | -25, -25, 4     | -19      | -19      | -38       | -43, -43, -28    |
| Fe-Cu(CO <sub>2</sub> H) <sub>4</sub> | 2    | 1.27            | 2.46        | -45      | -7       | -51       | -43, -87, -22   | 1        | 18       | 20        | -30, 43, 46      |
|                                       | 4    | 1.95            | 2.05        | 8        | 3        | 11        | -6, 21, 21      | -1       | -6       | -7        | -15, -15, 8      |
|                                       | 6    | 2.04            | 2.05        | 6        | 2        | 8         | -3, 15, 15      | 1        | 5        | 5         | 11, 11, 8        |

**Table S4.** The electronic excitation parameters, wavelengths  $\lambda$  (nm), oscillator strength ( $f$ ), and the molecular orbital contributions in the dominant electronic transitions for Fe-Ni(BTC)<sub>4</sub> and Fe-Ni(BDC)<sub>4</sub> systems.

|                         | $\lambda$<br>(nm) | $f$    | Major contributions | The character of involved MOs*             | Type |
|-------------------------|-------------------|--------|---------------------|--------------------------------------------|------|
| Fe-Ni(BTC) <sub>4</sub> | 1530              | 0.0005 | H-4→L+4(%92)        | H-4 (%0 Ni, %0 Fe)<br>L+4 (%5 Ni, %66 Fe)  | LMCT |
|                         | 808               | 0.003  | H-1→L+4(%82)        | H-1 (%82 Ni, %0 Fe)<br>L+4 (%5 Ni, %66 Fe) | MMCT |
| Fe-Ni(BDC) <sub>4</sub> | 679               | 0.001  | H-2 → L+2 (%61)     | H-2(%0 Ni, %0 Fe)<br>L+2 (%69 Ni, %10 Fe)  | LMCT |
|                         | 479               | 0.003  | H-1→L+2(%69)        | H-1(%0 Ni, %85 Fe)<br>L+2 (%69 Ni, %10 Fe) | MMCT |

\* H and L refer to HOMO and LUMO, respectively.

**Table S5.** Adsorption enthalpies for different adsorption modes of NO molecule over

| Host systems                                          | (2S+1) | Host+ Guest systems (2S+1) |    | $\Delta H_{ads}$ (kcal mol <sup>-1</sup> )<br>Fe-site |        | $\Delta H_{ads}$ (kcal mol <sup>-1</sup> )<br>M-site |        |
|-------------------------------------------------------|--------|----------------------------|----|-------------------------------------------------------|--------|------------------------------------------------------|--------|
|                                                       |        | HS                         | LS | HS                                                    | LS     | HS                                                   | LS     |
| Fe-Co(CO <sub>2</sub> H) <sub>4</sub>                 | 2      | 3                          | 1  | -8.39                                                 | -4.44  | -7.029                                               | 27.67  |
| [Fe-Co(CO <sub>2</sub> H) <sub>4</sub> ] <sup>-</sup> | 3      | 4                          | 2  | -58.86                                                | -30.23 | -50.84                                               | -14.49 |
| Fe-Ni(CO <sub>2</sub> H) <sub>4</sub>                 | 3      | 4                          | 2  | -38.58                                                | -31.45 | -12.16                                               | 0.78   |
| [Fe-Ni(CO <sub>2</sub> H) <sub>4</sub> ] <sup>-</sup> | 2      | 3                          | 1  | -18.02                                                | -17.05 | -10.42                                               | -      |
| Fe-Cu(CO <sub>2</sub> H) <sub>4</sub>                 | 2      | 3                          | 3  | -8.51                                                 | -8.2   | 7.93                                                 | -      |

Fe-M(CO<sub>2</sub>H)<sub>4</sub> (M=Co, Ni, Cu) systems.

\*The paramagnetic NO having an unpaired electron can form Low spin (LS) or high spin (HS) complexes with the host system.

**Table S6.** The calculated HFC tensor (MHz) for nitric oxide.

|    | $A^{FC}$ | $A^{PC}$ | $A^{iso}$ | $A^{SD}$     | $A$          |
|----|----------|----------|-----------|--------------|--------------|
| NO | 10       | -5       | 5         | -36, -38, 74 | -25, -43, 84 |

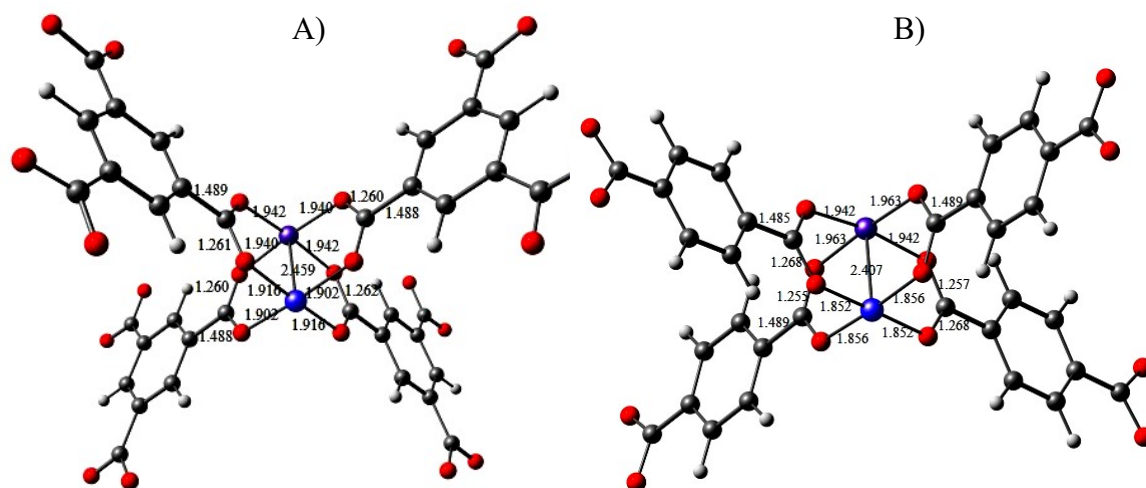

**Figure S1.** Optimized structure of A) Fe-Ni(BTC)<sub>4</sub>, B) Fe-Co(BTC)<sub>4</sub> and C) Fe-Ni(BDC)<sub>4</sub>. [color code: violet = Fe, red = O, gray = C, white = H, and dark blue= Ni].

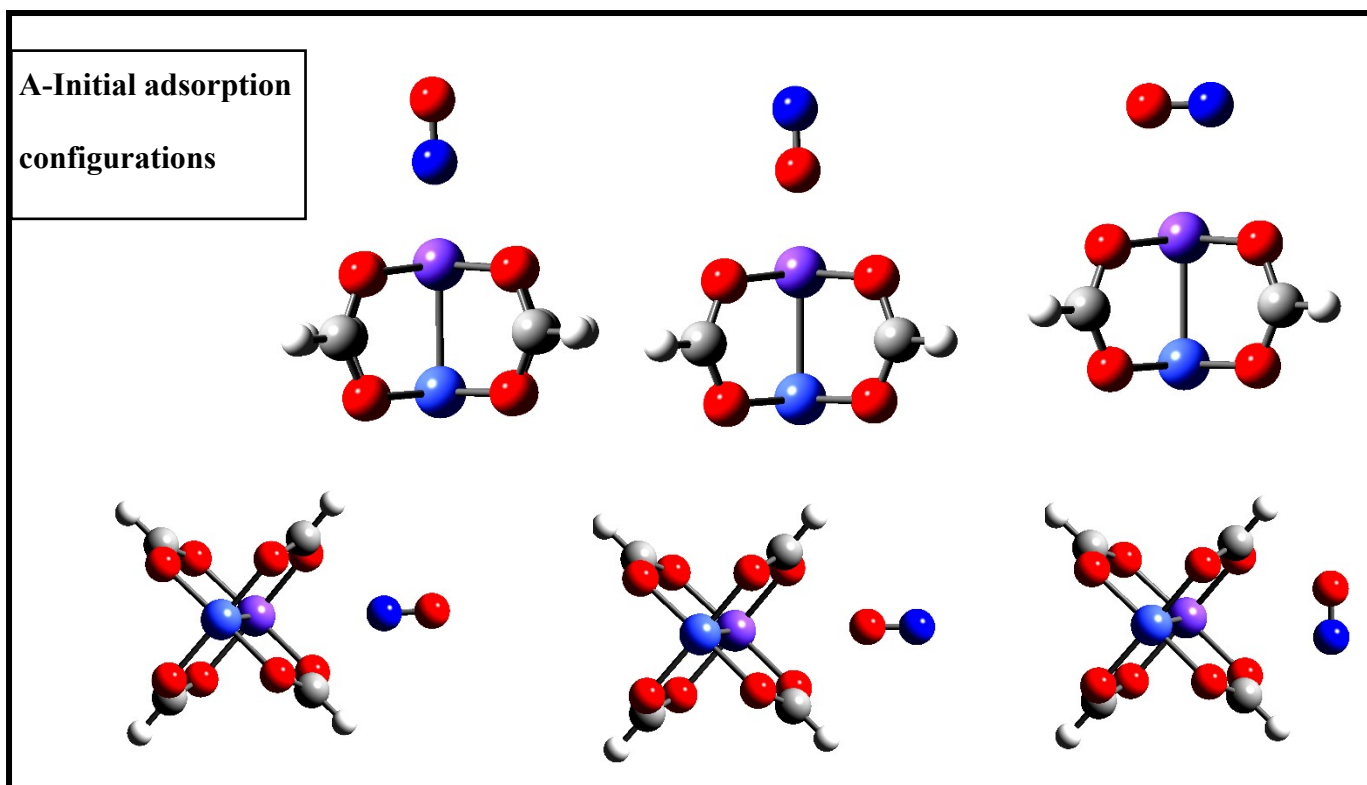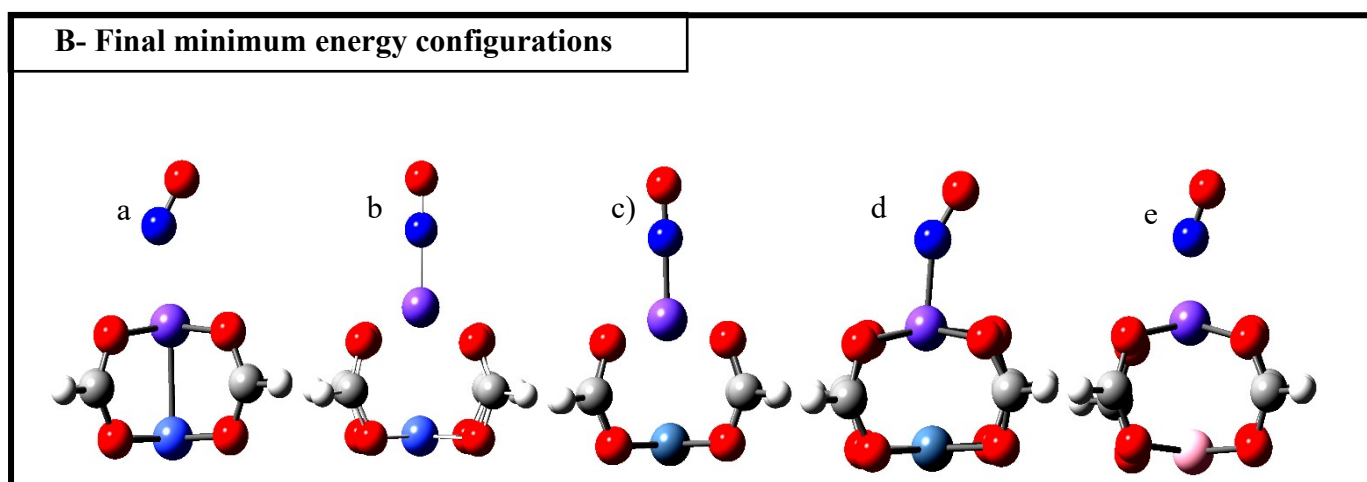

**Figure S2.** A) Possible orientations for the initial configurations of NO adsorption over Fe-M(CO<sub>2</sub>H)<sub>4</sub> systems. B) Global minima configurations related to the lowest energy configurations for the adsorption of NO over a) Fe-Co(CO<sub>2</sub>H)<sub>4</sub>, b) [Fe-Co(CO<sub>2</sub>H)<sub>4</sub>]<sup>-</sup>, c) Fe-Ni(CO<sub>2</sub>H)<sub>4</sub>, d) [Fe-Ni(CO<sub>2</sub>H)<sub>4</sub>]<sup>-</sup>, and e) Fe-Cu(CO<sub>2</sub>H)<sub>4</sub> systems. [color code: red = O, dark blue = N, gray = C, white = H, violet = Fe, blue = Co, pink = Cu and light blue = Ni].



**Cartesian coordinates of isolated Fe-M(CO<sub>2</sub>H)<sub>4</sub> and [Fe-M(CO<sub>2</sub>H)<sub>4</sub>]<sup>-</sup> as well as their complexes with NO molecule and also the test systems Fe-Ni(BTC)<sub>4</sub> and Fe-Ni(BDC)<sub>4</sub>.**

| System                                    | Multiplacity   |             | Energy                   |
|-------------------------------------------|----------------|-------------|--------------------------|
| <b>Fe-Co(CO<sub>2</sub>H)<sub>4</sub></b> | <b>Doublet</b> |             | <b>E= -3402.45 a. u.</b> |
| Co                                        | 0.00000000     | 0.00000000  | 1.15655500               |
| Fe                                        | 0.00000000     | 0.00000000  | -1.19435500              |
| O                                         | -1.35390600    | 1.35390500  | 1.11064100               |
| O                                         | 1.35390500     | -1.35390600 | 1.11064100               |
| O                                         | -1.35390600    | -1.35390600 | 1.11064100               |
| O                                         | 1.35390500     | 1.35390600  | 1.11064100               |
| O                                         | 1.36508600     | 1.36508500  | -1.13693900              |
| O                                         | -1.36508500    | -1.36508600 | -1.13693800              |
| O                                         | 1.36508600     | -1.36508600 | -1.13693900              |
| O                                         | -1.36508500    | 1.36508600  | -1.13693800              |
| C                                         | -1.75629700    | 1.75629700  | -0.00532400              |
| C                                         | 1.75629700     | -1.75629800 | -0.00532400              |
| C                                         | -1.75629700    | -1.75629800 | -0.00532400              |
| C                                         | 1.75629700     | 1.75629700  | -0.00532400              |
| H                                         | 2.53168100     | -2.53168000 | 0.00202100               |
| H                                         | -2.53168100    | -2.53168000 | 0.00202100               |
| H                                         | -2.53168100    | 2.53168000  | 0.00202100               |
| H                                         | 2.53168000     | 2.53168100  | 0.00202100               |

|                                           |                |             |                          |
|-------------------------------------------|----------------|-------------|--------------------------|
| <b>Fe-Ni(CO<sub>2</sub>H)<sub>4</sub></b> | <b>Triplet</b> |             | <b>E= -3527.98 a. u.</b> |
| Ni                                        | 0.00003500     | -0.06281100 | 1.90738800               |
| Fe                                        | -0.00003200    | 2.35388800  | 1.90745500               |
| O                                         | 0.00005300     | 0.00070000  | 0.02751100               |
| O                                         | 0.00005300     | 0.00079400  | 3.78726500               |
| O                                         | 1.87991100     | 0.00070000  | 1.90736900               |

|   |             |            |             |
|---|-------------|------------|-------------|
| O | -1.87984300 | 0.00079400 | 1.90736900  |
| O | -1.94821400 | 2.25456700 | 1.90747800  |
| O | 1.94814800  | 2.25447600 | 1.90747800  |
| O | -0.00005400 | 2.25456700 | 3.85563700  |
| O | -0.00005400 | 2.25447500 | -0.04072600 |
| C | 0.00000200  | 1.11387600 | -0.56040100 |
| C | 0.00000200  | 1.11393700 | 4.37524300  |
| C | 2.46782300  | 1.11387700 | 1.90742200  |
| C | -2.46782100 | 1.11393700 | 1.90742200  |
| H | -0.00000700 | 1.06858600 | 5.47127300  |
| H | 3.56385600  | 1.06859600 | 1.90742800  |
| H | -0.00000700 | 1.06859600 | -1.65643300 |
| H | -3.56385000 | 1.06858600 | 1.90742800  |

**Fe-Cu(CO<sub>2</sub>H)<sub>4</sub> Doublet E= -3660.16a. u.**

|    |             |             |             |
|----|-------------|-------------|-------------|
| Cu | 0.00000000  | 0.00000000  | 1.22913500  |
| Fe | 0.00000000  | 0.00000000  | -1.34430300 |
| O  | 0.00000000  | 1.97058300  | 1.12125900  |
| O  | 0.00000000  | -1.97058300 | 1.12125900  |
| O  | -1.97058300 | 0.00000000  | 1.12125900  |
| O  | 1.97058300  | 0.00000000  | 1.12125900  |
| O  | 1.91345300  | 0.00000000  | -1.12648800 |
| O  | -1.91345300 | 0.00000000  | -1.12648800 |
| O  | 0.00000000  | -1.91345300 | -1.12648800 |
| O  | 0.00000000  | 1.91345300  | -1.12648800 |
| C  | 0.00000000  | 2.49800000  | -0.01395000 |
| C  | 0.00000000  | -2.49800000 | -0.01395000 |
| C  | -2.49800000 | 0.00000000  | -0.01395000 |
| C  | 2.49800000  | 0.00000000  | -0.01395000 |
| H  | 0.00000000  | -3.59499000 | -0.04772800 |
| H  | -3.59499000 | 0.00000000  | -0.04772800 |
| H  | 0.00000000  | 3.59499000  | -0.04772800 |
| H  | 3.59499000  | 0.00000000  | -0.04772800 |

| <b>[Fe-Co(CO<sub>2</sub>H)<sub>4</sub>]<sup>-</sup> Triplet E= -3402.49 a. u.</b> |             |             |             |
|-----------------------------------------------------------------------------------|-------------|-------------|-------------|
| Co                                                                                | 0.00000000  | 0.00000000  | 1.18506500  |
| Fe                                                                                | 0.00000000  | 0.00000000  | -1.18493400 |
| O                                                                                 | 0.00000000  | 1.97370300  | 1.11350200  |
| O                                                                                 | 0.00000000  | -1.97370300 | 1.11350200  |
| O                                                                                 | -1.97370300 | 0.00000000  | 1.11350200  |
| O                                                                                 | 1.97370300  | 0.00000000  | 1.11350200  |
| O                                                                                 | 1.98463600  | 0.00000000  | -1.14629200 |
| O                                                                                 | -1.98463600 | 0.00000000  | -1.14629200 |
| O                                                                                 | 0.00000000  | -1.98463600 | -1.14629200 |
| O                                                                                 | 0.00000000  | 1.98463600  | -1.14629200 |
| C                                                                                 | 0.00000000  | 2.50910700  | -0.00524800 |
| C                                                                                 | 0.00000000  | -2.50910700 | -0.00524800 |
| C                                                                                 | -2.50910700 | 0.00000000  | -0.00524800 |
| C                                                                                 | 2.50910700  | 0.00000000  | -0.00524800 |
| H                                                                                 | 0.00000000  | -3.61415100 | -0.00362400 |
| H                                                                                 | -3.61415100 | 0.00000000  | -0.00362400 |
| H                                                                                 | 0.00000000  | 3.61415100  | -0.00362400 |
| H                                                                                 | 3.61415100  | 0.00000000  | -0.00362400 |

| <b>[Fe-Ni(CO<sub>2</sub>H)<sub>4</sub>]<sup>-</sup> Doublet E= -3528.07 a. u.</b> |             |             |             |
|-----------------------------------------------------------------------------------|-------------|-------------|-------------|
| Ni                                                                                | 0.00000000  | 0.00000000  | -1.13154200 |
| Fe                                                                                | -0.00000100 | -0.00000100 | 1.24136300  |
| O                                                                                 | 0.00000100  | 2.04586300  | -1.09566200 |
| O                                                                                 | 0.00000100  | -2.04586200 | -1.09566000 |
| O                                                                                 | 2.04586300  | 0.00000100  | -1.09566200 |
| O                                                                                 | -2.04586200 | 0.00000100  | -1.09566000 |
| O                                                                                 | -2.10356100 | -0.00000200 | 1.15168300  |
| O                                                                                 | 2.10355800  | -0.00000200 | 1.15168200  |
| O                                                                                 | -0.00000200 | -2.10356100 | 1.15168300  |
| O                                                                                 | -0.00000200 | 2.10355800  | 1.15168200  |
| C                                                                                 | 0.00001300  | 2.62395300  | 0.01252300  |

|   |             |             |             |
|---|-------------|-------------|-------------|
| C | 0.00001300  | -2.62395500 | 0.01252400  |
| C | 2.62395300  | 0.00001300  | 0.01252300  |
| C | -2.62395500 | 0.00001300  | 0.01252400  |
| H | -0.00000800 | -3.73161100 | -0.01622300 |
| H | 3.73160900  | -0.00000800 | -0.01622200 |
| H | -0.00000800 | 3.73160900  | -0.01622200 |
| H | -3.73161100 | -0.00000800 | -0.01622300 |

**NO/Fe-Co(CO<sub>2</sub>H)<sub>4</sub> Triplet E= -3532.15 a. u.**

|    |             |             |             |
|----|-------------|-------------|-------------|
| Co | -0.00095000 | -0.00476500 | 1.05893500  |
| Fe | -0.02123300 | -0.00937500 | -1.37014700 |
| O  | -1.35423600 | 1.34624200  | 1.05084700  |
| O  | 1.34933400  | -1.36177400 | 1.02318900  |
| O  | -1.35625300 | -1.35716800 | 1.04532500  |
| O  | 1.35677500  | 1.34145800  | 1.02868400  |
| O  | 1.35323800  | 1.37401700  | -1.21704100 |
| O  | -1.40537100 | -1.36324200 | -1.19816700 |
| O  | 1.36038600  | -1.36851800 | -1.22080700 |
| O  | -1.38807000 | 1.37886200  | -1.19462800 |
| C  | -1.77171600 | 1.75336800  | -0.05894900 |
| C  | 1.74864900  | -1.76558700 | -0.09284300 |
| C  | -1.77591800 | -1.75919100 | -0.06387600 |
| C  | 1.75709400  | 1.74715400  | -0.08792900 |
| H  | 2.52007600  | -2.54516900 | -0.08814500 |
| H  | -2.55002000 | -2.53593300 | -0.04627900 |
| H  | -2.55357100 | 2.52249800  | -0.03607000 |
| H  | 2.54189800  | 2.51355400  | -0.07811900 |
| N  | -0.03719500 | 0.19542700  | -3.52168600 |
| O  | -0.04409000 | -0.37287900 | -4.51021100 |

**NO/Fe-Ni(CO<sub>2</sub>H) Quartet E= -3657.87 a. u.**

|    |             |            |            |
|----|-------------|------------|------------|
| Ni | -0.00195800 | 0.06945400 | 1.90347600 |
| Fe | 0.00740500  | 2.79437700 | 1.90085600 |

|   |             |            |             |
|---|-------------|------------|-------------|
| O | -0.00099400 | 0.07820100 | 0.01952900  |
| O | -0.00285800 | 0.08187100 | 3.78741800  |
| O | 1.88959000  | 0.06271000 | 1.90442500  |
| O | -1.89355600 | 0.07580200 | 1.90253900  |
| O | -1.99317000 | 2.31927600 | 1.89994500  |
| O | 2.00473100  | 2.30545800 | 1.90267700  |
| O | 0.00446900  | 2.32421900 | 3.91312700  |
| O | 0.00719900  | 2.32030400 | -0.11052400 |
| C | 0.00333000  | 1.17152000 | -0.60043800 |
| C | 0.00039500  | 1.17638800 | 4.40526700  |
| C | 2.50228600  | 1.15798500 | 1.90390100  |
| C | -2.49866200 | 1.17527500 | 1.90094500  |
| H | -0.00049200 | 1.09863000 | 5.50061600  |
| H | 3.59808600  | 1.08860200 | 1.90460600  |
| H | 0.00369000  | 1.09163600 | -1.69563400 |
| H | -3.59491600 | 1.11348000 | 1.90037800  |
| N | 0.01347300  | 4.57495100 | 1.89914100  |
| O | 0.01718400  | 5.72304800 | 1.89807000  |

**NO/Fe-Cu(CO<sub>2</sub>H)<sub>4</sub> Triplet E= -3789.86 a. u.**

|    |             |             |             |
|----|-------------|-------------|-------------|
| Cu | -1.58147800 | 0.01571600  | 0.19968600  |
| Fe | 1.07789000  | -0.01520100 | -0.19952300 |
| O  | -1.42180200 | -1.94043400 | 0.22454900  |
| O  | -1.38494200 | 1.96750600  | 0.12884300  |
| O  | -1.25455000 | 0.06020300  | 2.12123600  |
| O  | -1.84556100 | -0.02992700 | -1.72548300 |
| O  | 0.37651700  | -0.12681800 | -2.04391000 |
| O  | 0.96093600  | 0.10991300  | 1.75304100  |
| O  | 0.83008900  | 1.92723200  | -0.28409600 |
| O  | 0.81563200  | -1.95121100 | -0.04440100 |
| C  | -0.30295100 | -2.49392100 | 0.11620100  |
| C  | -0.27255100 | 2.49550200  | -0.10342900 |
| C  | -0.05764100 | 0.11041100  | 2.48427400  |

|                                                                                      |             |             |             |
|--------------------------------------------------------------------------------------|-------------|-------------|-------------|
| C                                                                                    | -0.81287700 | -0.10443000 | -2.43283700 |
| H                                                                                    | -0.25716600 | 3.59236000  | -0.15642900 |
| H                                                                                    | 0.12634300  | 0.16219300  | 3.56518800  |
| H                                                                                    | -0.29670500 | -3.59093600 | 0.16773000  |
| H                                                                                    | -0.96912000 | -0.15666700 | -3.51834400 |
| N                                                                                    | 2.85256300  | -0.03059400 | -0.36955300 |
| O                                                                                    | 3.91649900  | -0.00379800 | 0.06274200  |
| <b>NO/[Fe-Co(CO<sub>2</sub>H)<sub>4</sub>]<sup>-</sup> Quartet E= -3532.27 a. u.</b> |             |             |             |
| Co                                                                                   | 0.00727000  | -0.01430600 | 1.07166200  |
| Fe                                                                                   | 0.02033700  | 0.04513300  | -1.91514300 |
| O                                                                                    | -1.27822500 | 1.40945800  | 1.12590200  |
| O                                                                                    | 1.29249900  | -1.43936100 | 1.08121500  |
| O                                                                                    | -1.41747000 | -1.29986300 | 1.07114400  |
| O                                                                                    | 1.43173700  | 1.27003800  | 1.13571600  |
| O                                                                                    | 1.33649700  | 1.55616300  | -1.09137800 |
| O                                                                                    | -1.30305700 | -1.49741500 | -1.16468600 |
| O                                                                                    | 1.54378000  | -1.29027000 | -1.14712000 |
| O                                                                                    | -1.51046100 | 1.34909500  | -1.10868800 |
| C                                                                                    | -1.77929000 | 1.77130300  | 0.02366300  |
| C                                                                                    | 1.80298700  | -1.75727000 | -0.03021200 |
| C                                                                                    | -1.75258200 | -1.78356200 | -0.04719300 |
| C                                                                                    | 1.77636700  | 1.79772300  | 0.04040400  |
| H                                                                                    | 2.57164600  | -2.54873200 | 0.02884600  |
| H                                                                                    | -2.54302300 | -2.55372500 | 0.00567300  |
| H                                                                                    | -2.54863700 | 2.55984900  | 0.10759900  |
| H                                                                                    | 2.56614000  | 2.56510200  | 0.13057300  |
| N                                                                                    | 0.02879400  | 0.08132600  | -3.71444800 |
| O                                                                                    | 0.03451400  | 0.10589300  | -4.90757000 |
| <b>NO/[Fe-Ni(CO<sub>2</sub>H)<sub>4</sub>]<sup>-</sup> Triplet E= -3657.81 a. u.</b> |             |             |             |
| Ni                                                                                   | -0.02527500 | 0.05539900  | 1.92601000  |
| Fe                                                                                   | 0.01930900  | 2.53222100  | 1.83306400  |
| O                                                                                    | -0.16191500 | 0.01833300  | -0.11048600 |

|   |             |            |             |
|---|-------------|------------|-------------|
| O | 0.11712300  | 0.10891400 | 3.95523100  |
| O | 2.01233600  | 0.05851000 | 1.78218700  |
| O | -2.05599300 | 0.07895600 | 2.06282300  |
| O | -1.96109600 | 2.29648600 | 1.69186600  |
| O | 1.98460500  | 2.30022900 | 1.96414100  |
| O | -0.11085500 | 2.34348500 | 3.82086600  |
| O | 0.16262500  | 2.24389300 | -0.12553900 |
| C | 0.00796400  | 1.11782500 | -0.66484000 |
| C | -0.00639800 | 1.25040100 | 4.43299500  |
| C | 2.54538700  | 1.17708600 | 1.88034800  |
| C | -2.55382200 | 1.20193200 | 1.86983700  |
| H | -0.03012900 | 1.33461000 | 5.53478200  |
| H | 3.64970600  | 1.20981700 | 1.89868900  |
| H | 0.03155300  | 1.12740100 | -1.76951800 |
| H | -3.65691700 | 1.26581500 | 1.84502000  |
| N | -0.14230900 | 4.35192400 | 1.92428100  |
| O | -0.64550800 | 5.33869000 | 2.32002500  |

**Fe-Ni(BTC)<sub>4</sub> Triplet E= -5953.80 a. u.**

|    |             |             |             |
|----|-------------|-------------|-------------|
| Ni | 0.00000000  | 0.00000000  | 1.15159000  |
| Fe | 0.00000000  | 0.00000000  | -1.30769000 |
| O  | 6.21866900  | -0.23501500 | 3.60982500  |
| O  | -1.91319700 | 0.09437500  | 1.08484900  |
| O  | 0.01813700  | 1.93497500  | -1.17435200 |
| O  | 1.91319700  | -0.09437500 | 1.08484900  |
| O  | -0.01813700 | -1.93497500 | -1.17435200 |
| O  | 1.93653300  | -0.01013200 | -1.15622700 |
| O  | -0.09163800 | -1.89840500 | 1.06688100  |
| O  | -1.93653300 | 0.01013200  | -1.15622700 |
| O  | 0.09163800  | 1.89840500  | 1.06688100  |
| O  | 0.21290600  | 8.00234400  | 2.62265600  |
| O  | 8.08525500  | -0.08989700 | -2.54008300 |
| O  | -0.21290600 | -8.00234400 | 2.62265600  |
| O  | 8.02814900  | -0.23599500 | 2.59959600  |

|   |             |             |             |
|---|-------------|-------------|-------------|
| O | -0.05643400 | -8.09415000 | -2.51597700 |
| O | -8.02814900 | 0.23599500  | 2.59959600  |
| O | 0.05643400  | 8.09415000  | -2.51597700 |
| O | 0.00000000  | -6.31431800 | -3.57616600 |
| O | -6.21866900 | 0.23501500  | 3.60982500  |
| O | 0.00000000  | 6.31431800  | -3.57616600 |
| O | 0.22354400  | 6.18588200  | 3.62038700  |
| O | 6.29846800  | -0.02299400 | -3.58771900 |
| O | -0.22354400 | -6.18588200 | 3.62038700  |
| C | 0.19466900  | 6.75593100  | 2.50603700  |
| C | 6.83596400  | -0.06784900 | -2.45787200 |
| C | -0.19466900 | -6.75593100 | 2.50603700  |
| C | 6.78107600  | -0.21128300 | 2.49139400  |
| C | -0.04247600 | -6.84423000 | -2.44271000 |
| C | -6.78107600 | 0.21128300  | 2.49139400  |
| C | 0.04247600  | 6.84423000  | -2.44271000 |
| C | -2.50235600 | 0.06166000  | -0.03079200 |
| C | 0.06171700  | 2.49485900  | -0.04671800 |
| C | 2.50235600  | -0.06166000 | -0.03079200 |
| C | -0.06171700 | -2.49485900 | -0.04671800 |
| C | -4.70082700 | 0.06585600  | -1.20811300 |
| C | 0.12772200  | 4.65720700  | 1.19705200  |
| C | 4.70082700  | -0.06585600 | -1.20811300 |
| C | -0.12772200 | -4.65720700 | 1.19705200  |
| C | 4.67373900  | -0.13465200 | 1.19675600  |
| C | -0.05396700 | -4.70048600 | -1.20774300 |
| C | -4.67373900 | 0.13465200  | 1.19675600  |
| C | 0.05396700  | 4.70048600  | -1.20774300 |
| H | -4.16653400 | 0.02920600  | -2.15039600 |
| H | 0.14951800  | 4.09598000  | 2.12404000  |
| H | 4.16653400  | -0.02920600 | -2.15039600 |
| H | -0.14951800 | -4.09598000 | 2.12404000  |
| H | 4.11838200  | -0.15110000 | 2.12739100  |



|   |             |             |             |
|---|-------------|-------------|-------------|
| H | -0.01800700 | -4.17259700 | -2.15367400 |
| H | -4.11838200 | 0.15110000  | 2.12739100  |
| H | 0.01800700  | 4.17259700  | -2.15367400 |
| C | -3.99087300 | 0.08744000  | -0.01323300 |
| C | 0.08165600  | 3.98261000  | -0.01764600 |
| C | 3.99087300  | -0.08744000 | -0.01323300 |
| C | -0.08165600 | -3.98261000 | -0.01764600 |
| C | -6.77961900 | 0.13917700  | 0.01661600  |
| C | 0.11802600  | 6.77102500  | 0.03129800  |
| C | 6.77961900  | -0.13917700 | 0.01661600  |
| C | -0.11802600 | -6.77102500 | 0.03129800  |
| C | -6.09013700 | 0.09150900  | -1.18808100 |
| C | 0.14550000  | 6.04665700  | 1.21597500  |
| C | 6.09013700  | -0.09150900 | -1.18808100 |
| C | -0.14550000 | -6.04665700 | 1.21597500  |
| C | 6.06320300  | -0.16070700 | 1.20625100  |
| C | -0.07222600 | -6.08965700 | -1.17810400 |
| C | -6.06320300 | 0.16070700  | 1.20625100  |
| C | 0.07222600  | 6.08965700  | -1.17810400 |
| C | -6.83596400 | 0.06784900  | -2.45787200 |
| H | -7.86465300 | 0.15931100  | 0.02833500  |
| H | 0.13222500  | 7.85605400  | 0.05043900  |
| H | -0.13222500 | -7.85605400 | 0.05043900  |
| H | 7.86465300  | -0.15931100 | 0.02833500  |
| O | -8.08525500 | 0.08989700  | -2.54008300 |
| O | -6.29846800 | 0.02299400  | -3.58771900 |

**Fe-Ni(BDC)<sub>4</sub> Triplet E= -5202.65 a. u.**

|    |             |             |             |
|----|-------------|-------------|-------------|
| Ni | 0.00000000  | 0.00000000  | 1.08112300  |
| Fe | 0.00000000  | 0.00000000  | -1.31606500 |
| O  | -1.87543200 | 0.00000200  | 1.02296200  |
| O  | 0.00000800  | 1.94158900  | -1.22225500 |
| O  | 1.87543200  | -0.00000200 | 1.02296200  |

|   |             |             |             |
|---|-------------|-------------|-------------|
| O | -0.00000800 | -1.94158900 | -1.22225500 |
| O | 1.94152200  | -0.00000800 | -1.22227000 |
| O | -0.00000300 | -1.87541200 | 1.02297000  |
| O | -1.94152200 | 0.00000800  | -1.22227000 |
| O | 0.00000300  | 1.87541200  | 1.02297000  |
| C | -2.48769600 | 0.00000500  | -0.08569100 |
| C | 0.00000600  | 2.48771700  | -0.08566200 |
| C | 2.48769600  | -0.00000500 | -0.08569100 |
| C | -0.00000600 | -2.48771700 | -0.08566200 |
| C | -4.70526600 | 0.00000700  | -1.21861700 |
| C | 0.00000400  | 4.62884600  | 1.19939600  |
| C | 4.70526600  | -0.00000700 | -1.21861700 |
| C | -0.00000400 | -4.62884600 | 1.19939600  |
| C | 4.62889100  | 0.00000200  | 1.19923700  |
| C | -0.00000100 | -4.70535800 | -1.21844900 |
| C | -4.62889100 | -0.00000200 | 1.19923700  |
| C | 0.00000100  | 4.70535800  | -1.21844900 |
| H | -4.17588600 | 0.00001100  | -2.16256200 |
| H | 0.00000600  | 4.04261500  | 2.10910300  |
| H | 4.17588600  | -0.00001100 | -2.16256200 |
| H | -0.00000600 | -4.04261500 | 2.10910300  |
| H | 4.04271000  | 0.00000500  | 2.10897700  |
| H | 0.00000000  | -4.17603000 | -2.16242400 |
| H | -4.04271000 | -0.00000500 | 2.10897700  |
| H | 0.00000000  | 4.17603000  | -2.16242400 |
| C | -3.97516400 | 0.00000400  | -0.03161900 |
| C | 0.00000400  | 3.97519400  | -0.03149600 |
| C | 3.97516400  | -0.00000400 | -0.03161900 |
| C | -0.00000400 | -3.97519400 | -0.03149600 |
| C | -6.73611300 | -0.00000200 | 0.05554800  |
| C | -0.00000400 | 6.73613100  | 0.05582900  |
| C | 6.73611300  | 0.00000200  | 0.05554800  |
| C | 0.00000400  | -6.73613100 | 0.05582900  |

|   |             |             |             |
|---|-------------|-------------|-------------|
| C | -6.08714100 | 0.00000400  | -1.17579700 |
| C | 0.00000000  | 6.01059900  | 1.24380600  |
| C | 6.08714100  | -0.00000400 | -1.17579700 |
| C | 0.00000000  | -6.01059900 | 1.24380600  |
| C | 6.01064200  | 0.00000500  | 1.24356900  |
| C | 0.00000300  | -6.08723400 | -1.17554800 |
| C | -6.01064200 | -0.00000500 | 1.24356900  |
| C | -0.00000300 | 6.08723400  | -1.17554800 |
| H | 6.67002200  | -0.00000600 | -2.08973100 |
| H | 6.53480900  | 0.00001000  | 2.19239400  |
| H | -6.53480900 | -0.00001000 | 2.19239400  |
| H | -6.67002200 | 0.00000600  | -2.08973100 |
| H | -0.00000700 | 6.67017100  | -2.08944900 |
| H | 0.00000000  | 6.53471400  | 2.19266000  |
| H | 0.00000000  | -6.53471400 | 2.19266000  |
| H | 0.00000700  | -6.67017100 | -2.08944900 |
| C | 0.00000900  | -8.20588400 | 0.10244600  |
| C | -8.20585300 | -0.00000500 | 0.10208800  |
| C | -0.00000900 | 8.20588400  | 0.10244600  |
| C | 8.20585300  | 0.00000500  | 0.10208800  |
| O | -0.00002100 | 8.88100300  | 1.15892500  |
| O | -0.00000400 | 8.94652800  | -0.90924800 |
| O | -8.88102900 | -0.00001400 | 1.15854000  |
| O | -8.94646100 | 0.00000200  | -0.90963300 |
| O | 8.94646100  | -0.00000200 | -0.90963300 |
| O | 8.88102900  | 0.00001400  | 1.15854000  |
| O | 0.00000400  | -8.94652800 | -0.90924800 |
| O | 0.00002100  | -8.88100300 | 1.15892500  |
